# Supplementary material for: Using observed urban NO x sinks to constrain VOC reactivity and the ozone and radical budget in the Seoul Metropolitan Area
Source: Copernicus journal article supplement (doi:10.5194/acp-24-9573-2024), 2024-08-29
Supplement: Supplementary file 1 [file acp-24-9573-2024-supplement.pdf]

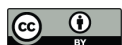

*Supplement of*

## **Using observed urban NO<sub>x</sub> sinks to constrain VOC reactivity and the ozone and radical budget in the Seoul Metropolitan Area**

**Benjamin A. Nault et al.**

*Correspondence to:* Benjamin A. Nault (bnault@aerodyne.com, bnault1@jh.edu)

The copyright of individual parts of the supplement might differ from the article licence.

30 **S1. Analytical Equation for P(O<sub>x</sub>)**

31 The analytical description of P(O<sub>x</sub>) and impacts from ΣANs chemistry has been described  
 32 elsewhere (Farmer et al., 2011 and references therein). Briefly, P(O<sub>x</sub>) can be described by  
 33 combining the following equations (Eq. S1 – S8). These equations are assumed to describe P(O<sub>x</sub>)  
 34 for a single time during the day and is derived from the assumption that the HO<sub>x</sub> radicals (HO<sub>x</sub> =  
 35 OH + HO<sub>2</sub> + RO<sub>2</sub>) are in photostationary steady-state. The steady-state assumption for HO<sub>x</sub> means  
 36 production and loss are equal.

$$37 \quad P(HO_x) = L(HO_x) = k_{OH+NO_2}[OH][NO_2] + \alpha k_{NO+RO_2}[NO][RO_2] +$$

$$38 \quad 2k_{HO_2+HO_2}[HO_2][HO_2] + 2k_{RO_2+HO_2}[HO_2][RO_2] + 2k_{RO_2+RO_2}[RO_2][RO_2] \quad (\text{Eq. S1})$$

39 As described elsewhere, under the assumption of rapid P(O<sub>x</sub>) and thus radical chain propagation  
 40 dominates, every RO<sub>2</sub> that is produced by the photooxidation of a VOC by OH will react with an  
 41 NO molecule (R2, Sect. 1), and some fraction of the time (e.g., 1 – α, the effective branching ratio),  
 42 produce HO<sub>2</sub> following the reaction of the alkoxy radical (RO) with O<sub>2</sub>. Therefore, it is assumed  
 43 that,

$$44 \quad [HO_2] \approx [RO_2] \approx \frac{k_{OH+VOC}[VOC][OH]}{(1-\alpha)k_{NO+RO_2}[NO]} \quad (\text{Eq. S2})$$

45 Combining Eq. S1 and S2 together with an assumed, constant P(HO<sub>x</sub>), [OH] can be calculated  
 46 using the quadratic formula:

$$47 \quad [OH_{Calc}] = \frac{-b \pm \sqrt{b^2 - 4ac}}{2a} \quad (\text{Eq. S3})$$

48 where

$$49 \quad a = (2k_{HO_2+HO_2} + 2k_{RO_2+HO_2} + 2k_{RO_2+RO_2}) \left( \frac{k_{OH+VOC}[VOC]}{(1-\alpha)k_{NO+RO_2}[NO]} \right)^2 \quad (\text{Eq. S4})$$

$$50 \quad b = k_{OH+NO_2}[NO_2] + \frac{\alpha k_{NO+RO_2}}{(1-\alpha)k_{NO+RO_2}} \quad (\text{Eq. S5})$$

$$51 \quad c = -P(HO_x) \quad (\text{Eq. S6})$$

52 In the above equations,  $k$  is the rate constant for the described reaction in the subtext (e.g.,  $\text{HO}_2 +$   
53  $\text{HO}_2$ ), the term  $k_{\text{OH}+\text{VOC}}[\text{VOC}]$  can be simplified to the VOC reactivity ( $R(\text{VOC})$ ,  $\text{s}^{-1}$ ) for the  
54 ambient mixture of VOCs,  $\alpha$  is the effective branching ratio for the ambient mixture of VOCs, and  
55  $P(\text{HO}_x)$  is the  $\text{HO}_x$  production rate for the ambient mixture of gases. The rate constants for the two  
56  $\text{HO}_x$  self-reactions,  $\text{HO}_2$  ( $k_{\text{HO}_2+\text{HO}_2}$ ) and  $\text{RO}_2$  ( $k_{\text{RO}_2+\text{RO}_2}$ ), and the  $\text{HO}_2$ - $\text{RO}_2$  reaction ( $k_{\text{HO}_2+\text{RO}_2}$ )  
57 were taken from Sander et al. (2011) for temperatures at 298 K and are  $1.4 \times 10^{-12}$ ,  $6.8 \times 10^{-14}$ , and  
58  $8 \times 10^{-12} \text{ cm}^3 \text{ molec.}^{-1} \text{ s}^{-1}$ , respectively. The OH and  $\text{NO}_2$  rate constant is also from Sander et al.  
59 (2011) for temperatures at 298 K and is  $1.2 \times 10^{-11} \text{ cm}^3 \text{ molec.}^{-1} \text{ s}^{-1}$ . For the base case used here,  
60  $P(\text{HO}_x)$  is assumed to be  $1 \times 10^7 \text{ molec. cm}^{-3} \text{ s}^{-1}$ ,  $\alpha$  is 0, and  $R(\text{VOC})$  ( $k_{\text{OH}+\text{VOC}}[\text{VOC}]$ ) is  $5.00 \text{ s}^{-1}$ .  
61 Finally, the instantaneous  $P(\text{O}_x)$  can be approximated as

$$62 \quad P(\text{O}_x) = k_{\text{HO}_2+\text{NO}}[\text{HO}_2][\text{NO}] + (1 - \alpha)k_{\text{RO}_2+\text{NO}}[\text{RO}_2][\text{NO}] \quad (\text{Eq. S7})$$

$$63 \quad P(\text{O}_x) = 2(1 - \alpha)k_{\text{OH}+\text{VOC}}[\text{VOC}][\text{OH}_{\text{Calc}}] \quad (\text{Eq. S8})$$

64 Note, that  $\alpha$  controls both  $P(\text{O}_x)$  (Eq. S8) and  $[\text{OH}_{\text{Calc}}]$  (Eq. S1, S2, S4, and S5). Thus, reducing  $\alpha$   
65 reduces both  $[\text{OH}_{\text{Calc}}]$  by ~40% (going from  $\alpha = 0.1$  to 0.05) and  $P(\text{O}_x)$  by ~10%.

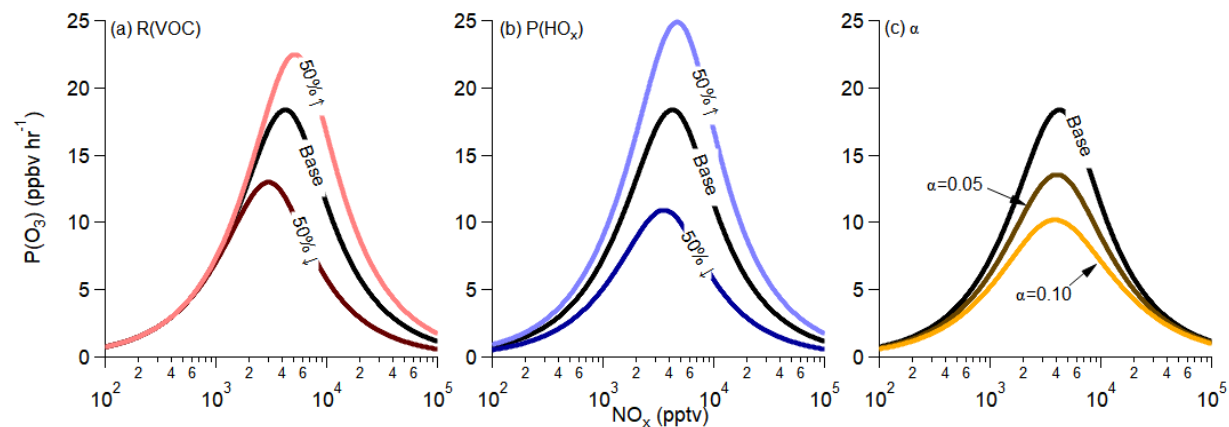

66

67 **Figure S1.** Example analytical solutions to instantaneous  $P(O_x)$ , assuming different scenarios with  
 68 changes in total VOC reactivity ( $R(VOC)$ ) (a), changes in  $HO_x$  radical production ( $P(HO_x)$ ) (b), or  
 69 changes in the alkyl and multi-functional nitrate effective branching ratio ( $\alpha$ ) (c). See Sect. S1 and  
 70 Eq. S1 – S8 for the analytical equations. Note, for all scenarios/panels here,  $R(VOC)$ ,  $P(HO_x)$ , and  
 71  $\alpha$  are constants, as discussed above and shown in Eq. S1 – S8.

72 **Table S1.** Measured VOCs and their associated MCMv3.3.1 species in F0AM.

| MCMv3.3.1 species | Aircraft observation                        |
|-------------------|---------------------------------------------|
| CH3CHO            | Acetaldehyde (PTRMS)                        |
| CH3COCH3          | Acetone (PTRMS)                             |
| BENZENE           | Benzene (PTRMS)                             |
| TOLUENE           | Toluene (PTRMS)                             |
| MXYL              | C8 alkylbenzenes (PTRMS)*20% <sup>1,2</sup> |
| PXYLE             | C8 alkylbenzenes (PTRMS)*20% <sup>1,2</sup> |
| OXYLE             | C8 alkylbenzenes (PTRMS)*17% <sup>1</sup>   |
| STYRENE           | C8 alkylbenzenes (PTRMS)*2% <sup>1</sup>    |
| EBENZ             | C8 alkylbenzenes (PTRMS)*41% <sup>1</sup>   |
| C2H4              | Ethene (WAS)                                |
| C2H2              | Ethyne (WAS)                                |
| C2H6              | Ethane (WAS)                                |
| C5H8              | Isoprene (WAS)                              |
| IC4H10            | i-Butane (WAS)                              |
| NC4H10            | n-Butane (WAS)                              |
| IC5H12            | i-Pentane (WAS)                             |
| NC5H12            | n-Pentane (WAS)                             |
| PBENZ             | i-Propylbenzene + n-Propylbenzene (WAS)     |
| MEK               | MEK (PTRMS)                                 |
| CH3OH             | Methanol (PTRMS)                            |
| C2H5OH            | Methanol/2.5 <sup>3</sup>                   |
| NC7H16            | n-Heptane (WAS)                             |
| NC10H22           | n-Decane (WAS)                              |
| NC6H14            | n-Hexane (WAS)                              |
| NC8H18            | n-Octane (WAS)                              |
| C3H8              | Propane (WAS)                               |
| C3H6              | Propene (WAS)                               |
| C4H6              | 1,3-Butadiene (WAS)                         |
| OETHTOL           | 2-Ethyltoluene (WAS)                        |
| METHTOL           | 3-Ethyltoluene (WAS)                        |
| PETHTOL           | 4-Ethyltoluene (WAS)                        |
| TM123B            | 1,2,3-Trimethylbenzene (WAS)                |
| TM124B            | 1,2,4-Trimethylbenzene (WAS)                |
| TM135B            | 1,3,5-Trimethylbenzene (WAS)                |
| BPINENE           | Monoterpenes (PTRMS)*0.45 <sup>1</sup>      |
| APINENE           | Monoterpenes (PTRMS)*0.55 <sup>1</sup>      |

73 <sup>1</sup>Speciated based on WAS measurements.74 <sup>2</sup>Assume 50/50 split m-xylene vs. p-xylene.75 <sup>3</sup>According to Schroeder et al. (2020)

76 **Table S2.** The higher PNs lumping based on their primary precursor species from F0AM.

| <b>Lumped PN</b> | <b>Primary Precursors</b>                                                                                            | <b>Largest PN in MCMv3.3.1</b> |
|------------------|----------------------------------------------------------------------------------------------------------------------|--------------------------------|
| Arom             | Aromatics: benzene, toluene,<br>xylenes, ethylbenzene,<br>propylbenzene, ethyltoluene,<br>trimethylbenzenes, styrene | ACCOMEPAN                      |
| Alk              | MEK, butane, pentane,<br>decane, etc.                                                                                | C3PAN1                         |
| Isop             | Isoprene                                                                                                             | CO2C3PAN                       |
| Monoterpenes     | Monoterpenes                                                                                                         | C3PAN2                         |

77

## 78 S2. Comparison of NO<sub>2</sub> Measurements

79 There were three different measurements of NO<sub>2</sub> on the DC-8 during KORUS-AQ: (1) by  
80 chemiluminescence (Weinheimer et al., 1994), (2) by laser induced fluorescence (Thornton et al.,  
81 2000), and (3) by cavity enhanced absorption spectroscopy (Min et al., 2016). Here, only  
82 chemiluminescence and laser induced fluorescence are considered. Comparison of the NO<sub>2</sub> mixing  
83 ratios by these two measurements are shown in Figure S2. Though the correlation is high ( $R^2 =$   
84 1.00), the laser induced fluorescence NO<sub>2</sub> is ~16% higher than the chemiluminescence NO<sub>2</sub>. To  
85 determine which NO<sub>2</sub> to use for the study, the NO<sub>2</sub>-to-NO ratio was compared, as this ratio can be  
86 calculated with the observations on the DC-8. This ratio is defined by Eq. S9:

$$87 \quad \frac{[\text{NO}_2]}{[\text{NO}]} = \frac{k_{\text{NO}+\text{O}_3}[\text{O}_3] + k_{\text{NO}+\text{HO}_2}[\text{HO}_2] + k_{\text{NO}+\text{RO}_2}[\text{RO}_2]}{j_{\text{NO}_2}} \quad (\text{Eq. S9})$$

88 Note, though steady-state RO<sub>2</sub> is used throughout the paper and can provide some uncertainty in  
89 the calculated NO<sub>2</sub>-to-NO ratio in Eq. S9, at high NO mixing ratios where both HO<sub>2</sub> and RO<sub>2</sub>  
90 concentrations are low, the O<sub>3</sub> + NO reaction dominates the term. It was found that the NO<sub>2</sub>-to-  
91 NO ratio using the University of California, Berkeley, NO<sub>2</sub> generally agreed better with the  
92 calculated NO<sub>2</sub>-to-NO ratio from Eq. S9. However, both NO<sub>2</sub>-to-NO ratios 1 $\sigma$  spread of  
93 observations overlap with the calculated NO<sub>2</sub>-to-NO ratio from Eq. S9. Thus, the University of  
94 California, Berkeley, NO<sub>2</sub> measurements are used throughout the manuscript. The use of the  
95 NCAR NO<sub>2</sub> had small changes but does not change the main conclusions and trends discussed  
96 throughout the paper.

97 Finally, photostationary steady-state (PSS) NO<sub>2</sub>, calculated through rearrangement of Eq.  
98 S9, is compared against the measured NO<sub>2</sub> by chemiluminescence (CL) and laser induced  
99 fluorescence (LIF) in Fig. S4. The measured NO<sub>2,LIF</sub> versus NO<sub>2,PSS</sub> is closer to the one-to-one line  
100 (slope = 1.06) compared to the measured NO<sub>2,CL</sub> versus NO<sub>2,PSS</sub> (slope = 1.23). This further

101 supports the results in Fig. S3, showing that the  $\text{NO}_{2,\text{LIF}}$  ( $\text{NO}_2$  UCB in Fig. S3) is closer to the

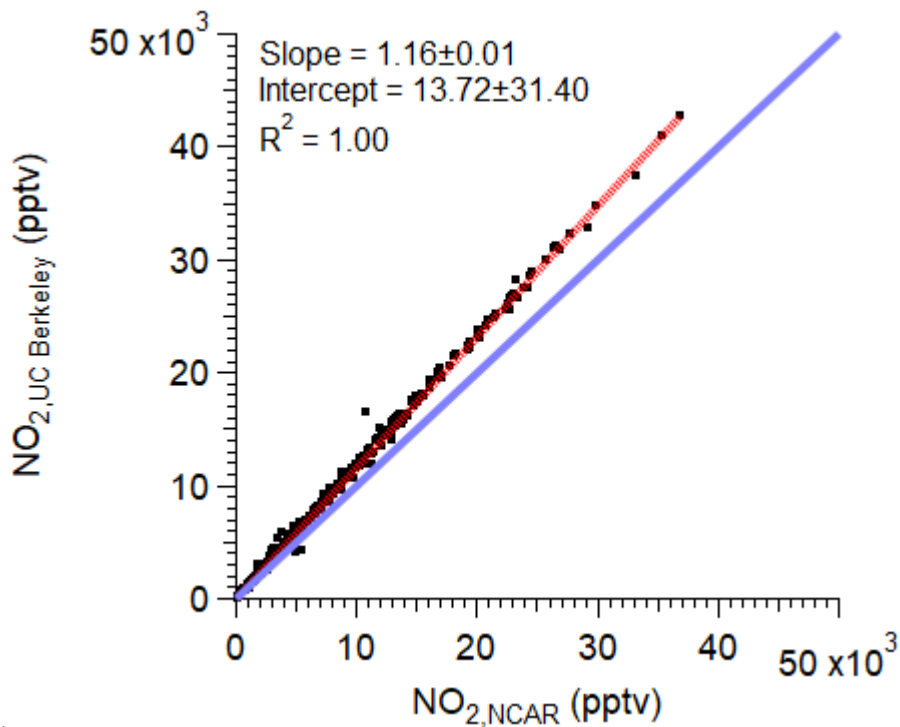

102 predicted PSS  $\text{NO}_2$ .

103 **Figure S2.** Scatter plot of the  $\text{NO}_2$  measured by University of California, Berkeley, laser induced  
104 fluorescence and the NCAR chemiluminescence. The one-to-one line is shown in blue and the  
105 ODR fit for the data is shown in red.



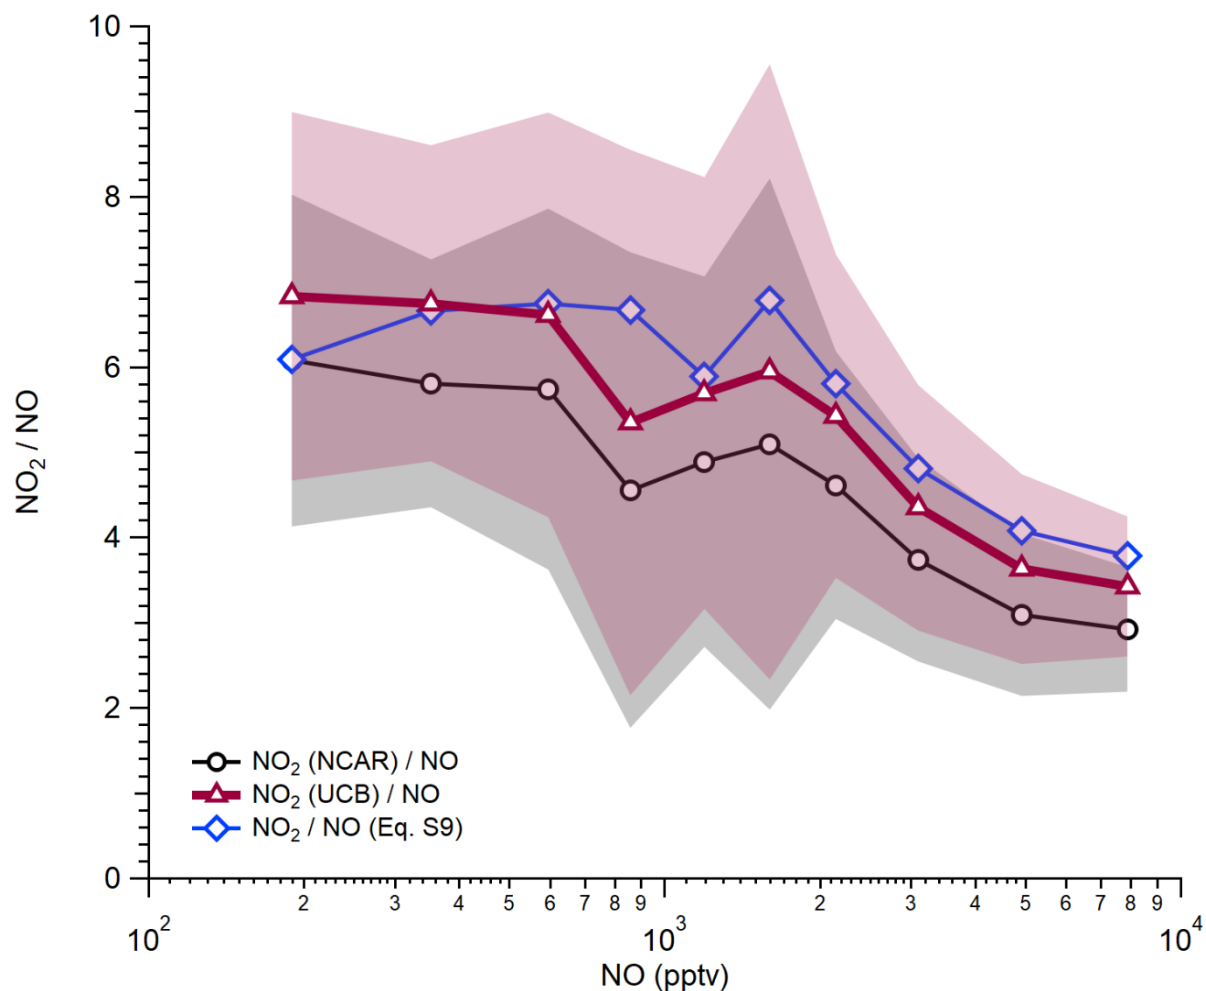

106

107 **Figure S3.** Binned NO<sub>2</sub>-to-NO ratio, where NO is from NCAR chemiluminescence and NO<sub>2</sub> is  
 108 either from NO<sub>2</sub> chemiluminescence (black) or University of California, Berkeley, laser induced  
 109 fluorescence (dark red), versus NO. Shading is ±1σ spread in the observations for both observed  
 110 ratios. The NO<sub>2</sub>-to-NO ratio in blue is calculated using observations (Table 2) and Eq. S9.  
 111

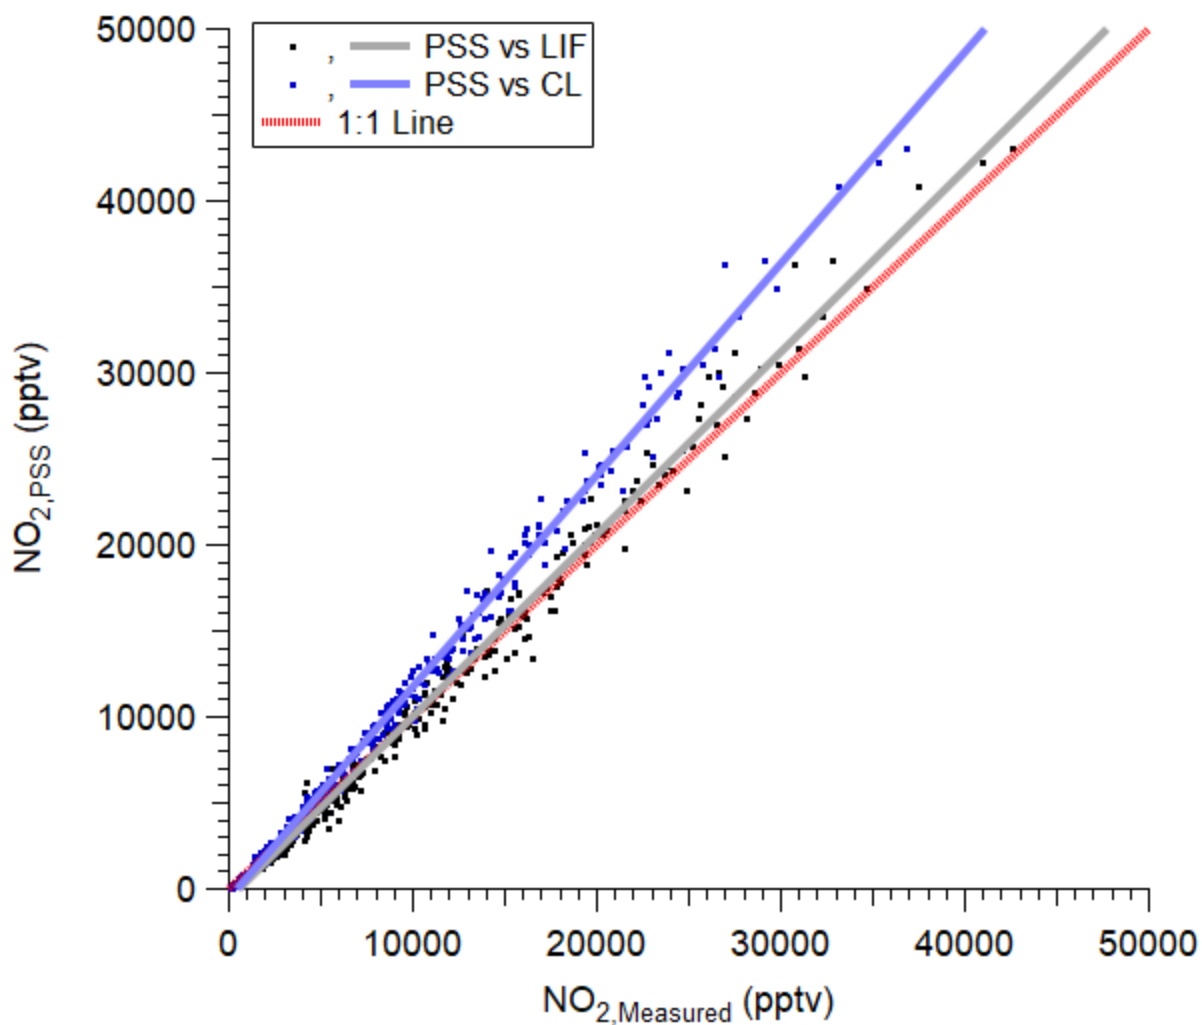

112  
 113 **Figure S4.** Scatter plot of predicted NO<sub>2</sub> PSS, from Eq. S9, and measured NO<sub>2</sub>, from laser induced  
 114 fluorescence (LIF) or chemiluminescence (CL). The PSS vs CL slope is 1.23, the PSS vs LIF slope  
 115 is 1.06, and the 1:1 line is red.

### 116 S3. Error Analysis in Calculation of $\alpha_{\text{eff}}$ and R(VOC)

117 In Sect. 3.3, Eq. 8 – 11 assumes that  $L(\text{O}_x)$  and  $L(\Sigma\text{ANs})$  is negligible. However,  $L(\text{O}_x)$  is  
118 approximately 25% of the  $P(\text{O}_x)$  over SMA (e.g., Figure 6). An analysis of how much unmeasured  
119 R(VOC) and the  $\alpha_{\text{eff}}$  is impacted by neglecting these two terms is calculated using Eq. S9.

$$120 \quad \frac{\Delta\text{O}_x}{\Delta\Sigma\text{ANs}} \approx \frac{P_{\text{O}_x}}{P\Sigma\text{ANs}} = \frac{\gamma(1-\alpha)R(\text{VOC})[\text{OH}] - L(\text{O}_x)}{\alpha R(\text{VOC})[\text{OH}] - L(\Sigma\text{ANs})} \quad (\text{Eq. S9})$$

121 Here,  $\gamma$  is the effective  $\text{O}_x$  produced per VOC reacted (1.53),  $\alpha$  is the effective branching ratio to  
122 form  $\Sigma\text{ANs}$ ,  $R(\text{VOC})$  is the VOC and CO reactivity, and  $L_{\text{O}_x}$  and  $L_{\Sigma\text{ANs}}$  are the loss terms for  $\text{O}_x$   
123 and  $\Sigma\text{ANs}$ .

124 One limit in these equations is if  $L(\Sigma\text{ANs})$  is near 0 and  $L(\text{O}_x)$  is important. At this limit,  
125 assuming all R(VOC) is captured by observations, this would lead to an  $\alpha_{\text{eff}}$  of  $\sim 0.02$ . This is  
126 equivalent to the calculated  $\alpha_{\text{eff}}$  using the observed VOCs and calculated secondary VOCs from  
127 F0AM and would indicate no missing R(VOCs).

128 However, there are multiple reasons to assume this limit in that  $L(\Sigma\text{ANs})$  is 0 is incorrect  
129 and that the observations do not capture  $\alpha_{\text{eff}}$  and R(VOC). First, the total OH reactivity measured  
130 by Penn State indicates missing reactivity at low  $\text{NO}_x$  mixing ratios, as discussed in Sect. 3.3 and  
131 shown in Fig. 4. Second, the comparison of speciated and measured  $\Sigma\text{PNs}$  as well as the  
132 comparison of the F0AM calculated and measured  $\Sigma\text{PNs}$  indicates missing R(VOC) to account  
133 for the unmeasured PNs, as discussed in Sect. 3.1 and 3.4 and Fig. 2 and 5. Finally, González-  
134 Sánchez et al. (2023) showed that even for long-lived ANs, the lifetime is  $\sim 50$  hours. However,  
135 for multifunctional ANs, this lifetime drops down to 2 – 16 hours. Note, however these  
136 multifunctional ANs are mainly from biogenic VOCs and not anthropogenic VOCs. Yet, as  
137 predicted in MCM (Jenkin et al., 2015), ANs from anthropogenic VOCs are expected to have  
138 similar lifetimes as ANs from biogenic VOCs.

139 To investigate the role of  $L(\sum\text{ANs})$  and  $L(\text{O}_x)$  on unmeasured  $R(\text{VOC})$  and  $\alpha$ , Eq. S9  
140 instead of Eq. 11 is used. The results are summarized in Figure S4. If the ANs lifetime of 16 hours  
141 is assumed, which may be a lower limit, the average unmeasured  $R(\text{VOC})$  decreases from  $1.7_{-0.4}^{+1.1}\text{s}^{-1}$   
142 to  $1.4\text{ s}^{-1}$ , and the unmeasured  $\alpha$  would be 0.09, leading to an  $\alpha_{\text{eff}}$  of 0.032. Note, both of these  
143 values are very close to the values calculated assuming losses were negligible. For the unmeasured  
144  $R(\text{VOC})$  and  $\alpha$  shown in Fig. 4, the  $\sum\text{ANs}$  lifetime would be equivalent to 11.5 hrs. This is in the  
145 range of lifetime for multifunctional ANs, but a lower limit (González-Sánchez et al., 2023). If the  
146 typical ANs lifetime shown in González-Sánchez et al. (2023), ~6 hrs, is assumed, the average  
147 unmeasured  $R(\text{VOC})$  increases from  $1.7_{-0.4}^{+1.1}\text{ s}^{-1}$  to  $2.2\text{ s}^{-1}$ . This would lead to an  $\alpha_{\text{eff}}$  of 0.045. Note  
148 this is still with the uncertainty of  $R(\text{VOC})$  found with the Penn State observations at low  $\text{NO}_x$ .  
149 Thus, though uncertainty in both  $\sum\text{ANs}$  lifetime and the unmeasured  $\alpha$  impact the calculated  
150 unmeasured  $R(\text{VOC})$ , (a) inclusion of the loss terms of both  $\text{O}_x$  and  $\sum\text{ANs}$  lies within the spread in  
151 observed  $R(\text{VOC})$  at low  $\text{NO}_x$  mixing ratios and the associated calculated  $R(\text{VOC})$  assuming the loss  
152 terms were negligible, (b) if the  $L(\text{O}_x)$  term is considered, the  $L(\sum\text{ANs})$  term must also be included  
153 as it is non-negligible in environments with freshly-produced, multifunctional ANs.

154 There are two potential other sources of uncertainty in the calculated, unmeasured  
155  $R(\text{VOC})$ —(1) assumed  $\alpha$  for the F0AM secondary species and (2)  $\alpha$  for aromatics. First, for  $\alpha$   
156 ranging from 0.00 – 0.10 for F0AM species, the unmeasured  $R(\text{VOC})$  falls within the spread of  
157 observations and calculated unmeasured  $R(\text{VOC})$  assuming F0AM  $\alpha$  is 0.05. Thus, the calculated  
158 unmeasured is insensitive to the F0AM  $\alpha$  until the F0AM  $\alpha$  is greater than 0.10. Though the  $\alpha$   
159 values for secondary, oxygenated species is unconstrained (Orlando and Tyndall, 2012),  $\alpha$  being  
160 greater than 0.10 is currently unexpected with what is currently known about chemistry of these  
161 secondary species. Second, the  $\alpha$  for aromatic compounds was changed from the values found in

162 MCM (Jenkin et al., 2015) and Perring et al. (2013) to all being 0.01. This is due to recent a recent  
163 study finding that  $\alpha$  is potentially lower for aromatic compounds (Xu et al., 2020). Even with this  
164 low  $\alpha$  value for the aromatics, the average unmeasured RVOC is not greatly impacted, increasing  
165 from 1.7 to 1.8 s<sup>-1</sup>. This is due to the aromatics accounting for a small fraction of the total  $\alpha$  and  
166  $\sum$ ANs.

167 Thus, though there are numerous assumptions and sources of uncertainty associated with  
168 constraining the unmeasured RVOC with the observations, the overall results of, on average, 1.7  
169 s<sup>-1</sup> unmeasured RVOC is robust. As these various sensitivity investigations minimally impact the  
170 calculated unmeasured RVOCs using the assumptions in the main text, the unmeasured RVOCs  
171 associated with  $\alpha = 0.10$  and assuming the loss terms are negligible are used.

172 As described in Sect. S1 and Eq. 1 (and S7), HO<sub>2</sub> is important in the next O<sub>x</sub> production.  
173 However, an intercomparison of measured and F0AM modeled HO<sub>2</sub> shows that the two values  
174 diverge from the one-to-one line at high NO<sub>x</sub> mixing ratios (Figure S6a), where the measured HO<sub>2</sub>  
175 is higher compared to F0AM modeled HO<sub>2</sub>. As this is at high NO<sub>x</sub> mixing ratios, this impacts the  
176 calculated P(O<sub>x</sub>), where the measured HO<sub>2</sub> would suggest high P(O<sub>x</sub>) with increasing NO<sub>x</sub>,  
177 whereas F0AM HO<sub>2</sub> shows decreasing P(O<sub>x</sub>) with increasing NO<sub>x</sub> (Figures S6b). The latter,  
178 decreasing P(O<sub>x</sub>) with increasing NO<sub>x</sub>, more closely aligns with theory (e.g., Sect. S1 and  
179 (Seinfeld. and Pandis, 2006)). Further, the latter more closely aligns with observations in that P(O<sub>x</sub>)  
180 increases with decreasing NO<sub>x</sub>, e.g., the “NO<sub>x</sub> penalty” (Jhun et al., 2015; Pusede and Cohen,  
181 2012). Though calculations using observed HO<sub>2</sub> have suggested that P(O<sub>x</sub>) either remains constant  
182 and/or decreases wit the decreasing NO<sub>x</sub> (e.g., Whalley et al., 2018, 2021), this does not align with  
183 both theory and the “NO<sub>x</sub> penalty” observed, suggesting potential uncertainties for HO<sub>2</sub> at low

184 HO<sub>2</sub> and high NO<sub>x</sub> mixing ratios. Thus, to be consistent with theory and “NO<sub>x</sub> penalty”  
185 observations, F0AM calculated HO<sub>2</sub> is used throughout the study.

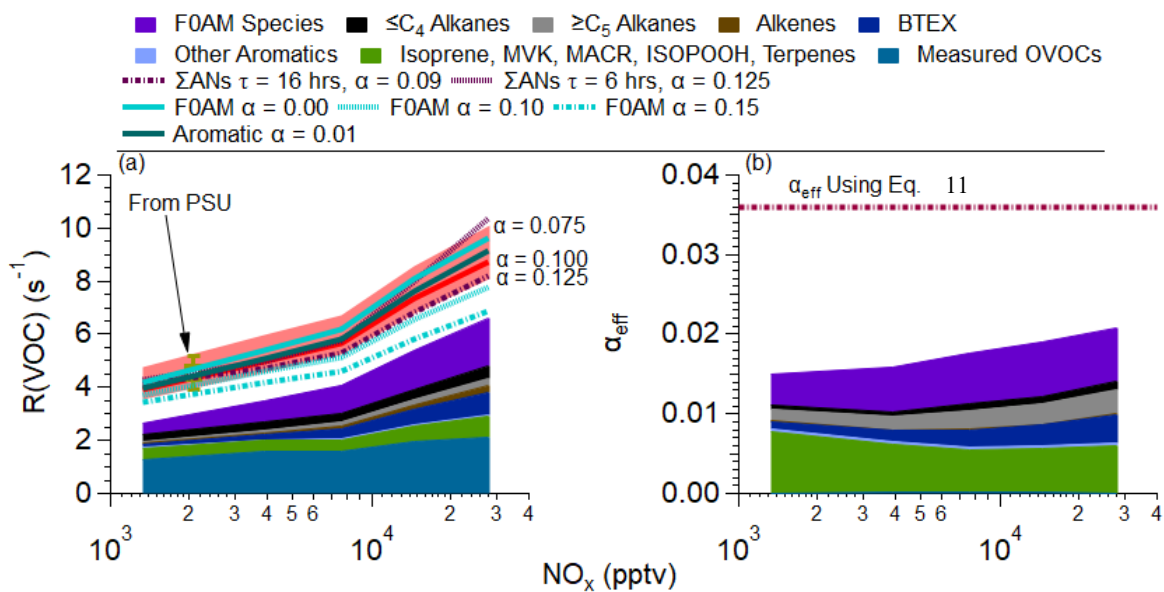

186

187 **Figure S5.** Same as Figure 4, but with the sensitivities discussed in Sect. S3, including inclusion  
 188 of  $\text{O}_x$  and ANs loss terms, range of  $\alpha$  for F0AM secondary species, and lowering the aromatic  $\alpha$   
 189 value.

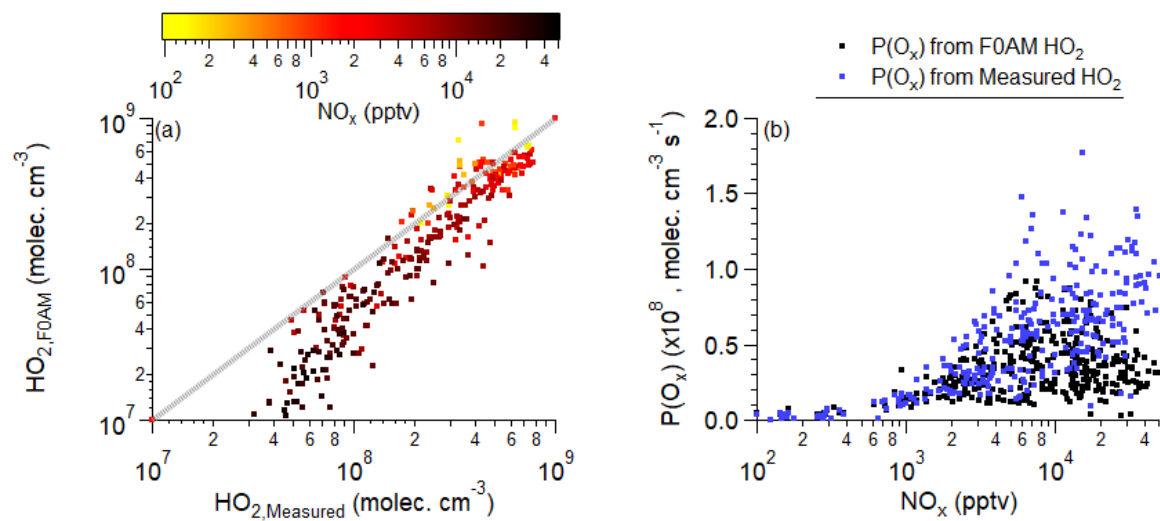

190

191 **Figure S6.** (a) Scatter plot of  $\text{HO}_2$  predicted from F0AM vs measured  $\text{HO}_2$ , colored by measured  
 192  $\text{NO}_x$  mixing ratios. One-to-one line represented by the grey line. (b) Calculated  $\text{P(O}_x\text{)}$ , using Eq.  
 193 1, for  $\text{HO}_2$  predicted by F0AM (black) or  $\text{HO}_2$  measured (blue).



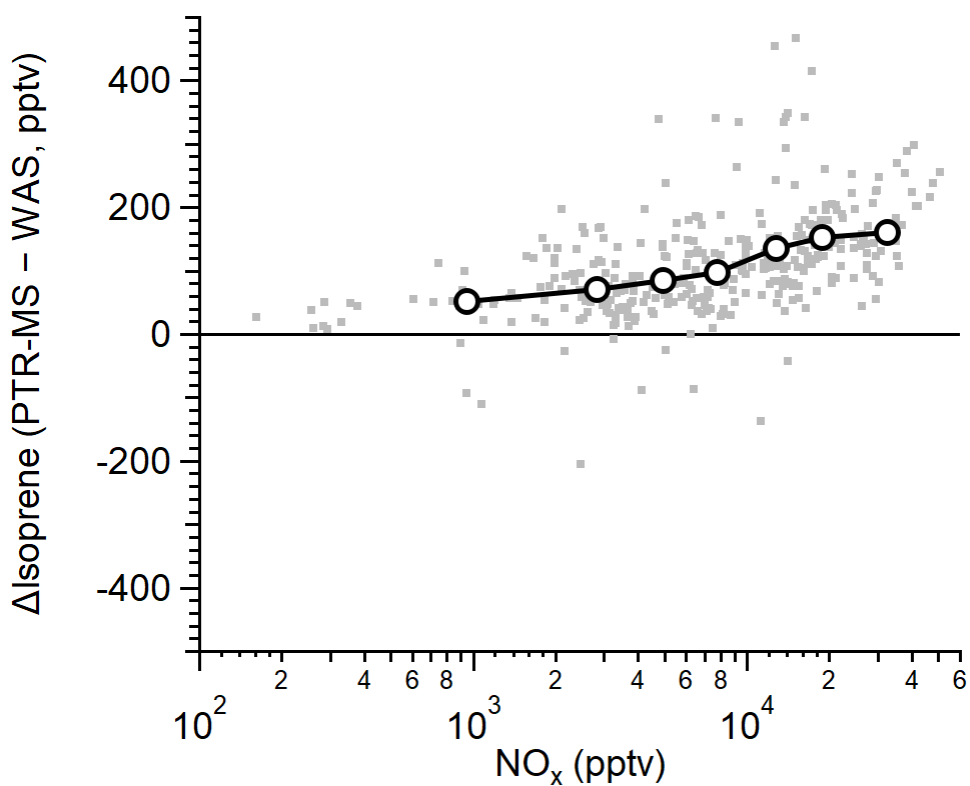

194

195 **Figure S7.** The difference in the isoprene mixing ratio measured by University of Oslo PTR-MS  
 196 and University of California, Irvine WAS, versus the observed NO<sub>x</sub>. All data are shown in grey  
 197 and equally sized bins are shown in black for observations collected over the SMA.

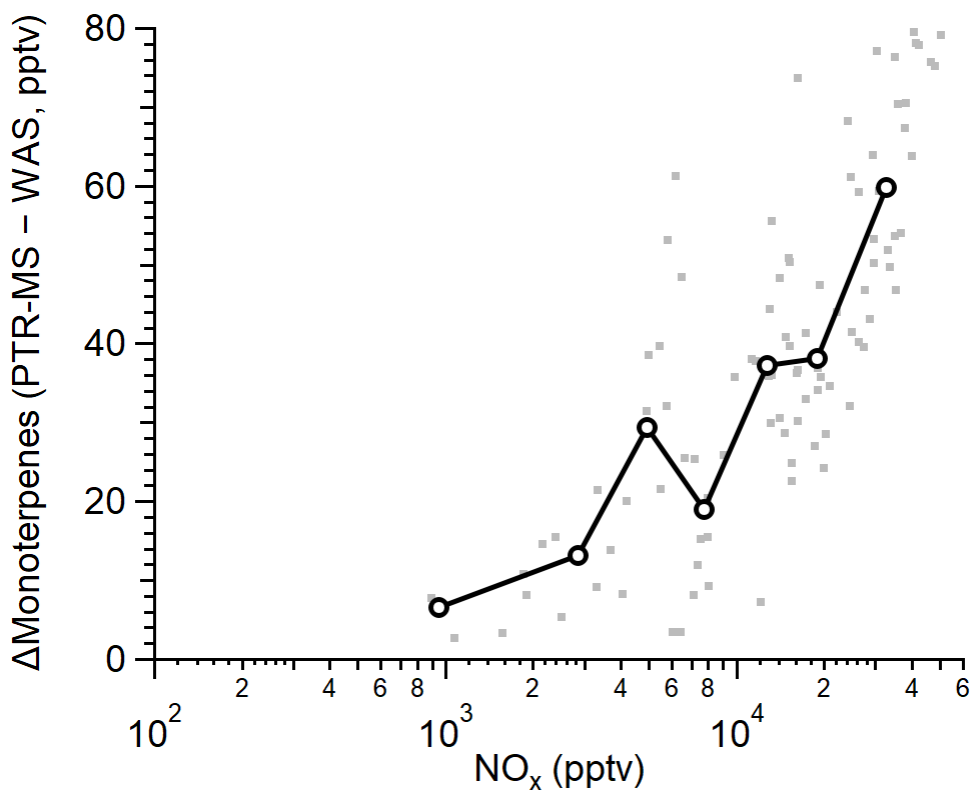

198

199 **Figure S8.** Same as Figure S7, but for monoterpenes. Lower amount of data is associated with the  
 200 measurements being below detection limit for WAS.

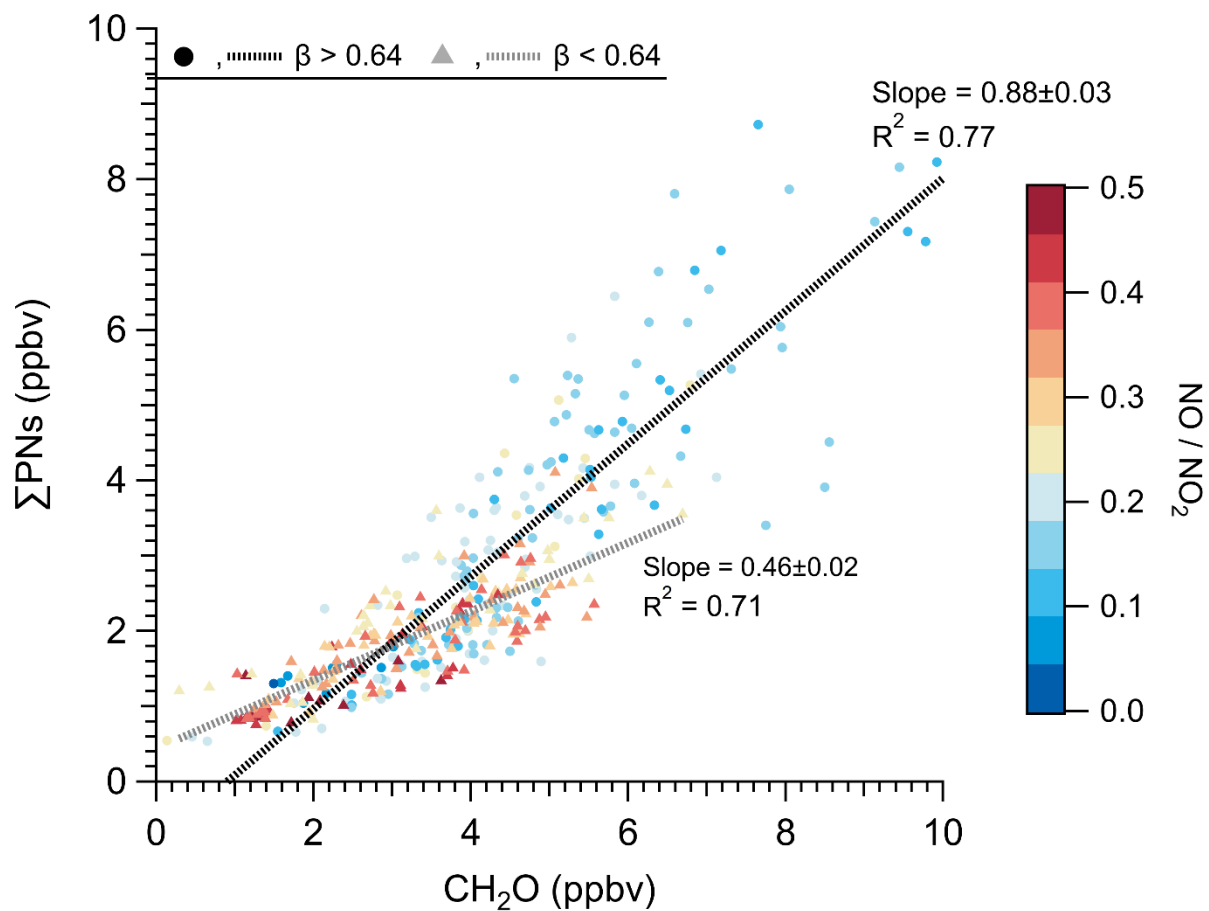

201

202 **Figure S9.** Same as Figure 3b, but with the data colored by the NO-to-NO<sub>2</sub> ratio. Further, the fits  
 203 are differentiated between the  $\beta$  value, where  $\beta$  value describes the fraction of time an acyl peroxy  
 204 radical (R(O)O<sub>2</sub>) reacts with NO<sub>2</sub> versus NO. The  $\beta$  is equal to  $(k_{\text{R(O)O}_2+\text{NO}_2}[\text{NO}_2]) / (k_{\text{R(O)O}_2+\text{NO}_2}[\text{NO}_2] + k_{\text{R(O)O}_2+\text{NO}}[\text{NO}])$ .  
 205

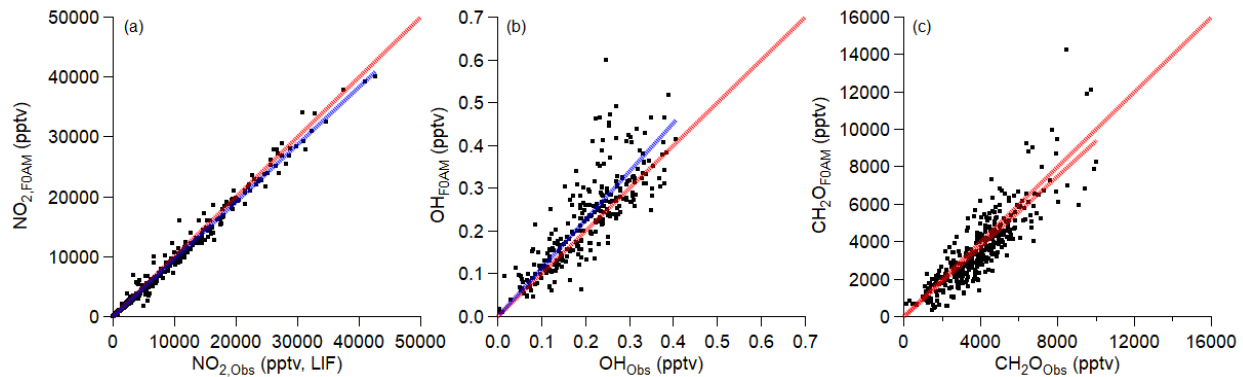

206

207 **Figure S10.** Evaluation of the F0AM model performance versus gases measured on DC-8 over  
 208 the SMA and not used to constrain the model. (a) Scatter plot of F0AM predicted NO<sub>2</sub> versus  
 209 observed NO<sub>2</sub> from UC Berkeley. (b) Scatter plot of F0AM predicted OH versus Penn State  
 210 observed OH. (c) Scatter plot of F0AM predicted CH<sub>2</sub>O versus CAMS observed CH<sub>2</sub>O.

#### 211 **S4. Sensitivity in F0AM Results with Missing R(VOC)**

212 We add to the model a test of whether the estimated additional OH reactivity of  $\sim 1.7 \text{ s}^{-1}$   
213 would degrade model performance in simulating formaldehyde or OH. We add approximately 800  
214 pptv of  $\text{C}_4\text{H}_9\text{CHO}$  (pentanal), on average, as a proxy for unmeasured aldehydes, such as octanal,  
215 nonanal, decanal, etc. The concentration of pentanal varies according to the calculated missing OH  
216 reactivity. The average OH reactivity from this species is  $\sim 0.5 \text{ s}^{-1}$ . Total OH reactivity goes up by  
217  $1.2 \text{ s}^{-1}$  after including all the products produced from the oxidation of pentanal. Therefore, the  
218 added primary species (pentanal) results in over twice as much reactivity from secondary oxidation  
219 products. The largest secondary oxidation products are smaller aldehydes ( $\text{HOC}_3\text{H}_6\text{CHO}$ ,  
220  $\text{HOC}_2\text{H}_4\text{CHO}$ ,  $\text{C}_3\text{H}_7\text{CHO}$ ), which have OH reactivity of 0.1 to  $0.2 \text{ s}^{-1}$  each. With the inclusion of  
221  $\sim 0.5 \text{ s}^{-1}$  pentanal to F0AM as a surrogate for missing R(VOC), OH is reduced by  $\sim 25\%$  compared  
222 to the base model (Figure S9). We attribute this OH reduction to the build-up of the peroxyxynitrate  
223 ( $\text{C}_5\text{H}_9\text{NO}_5$ ) from pentanal to approximately 500 pptv. This pentanal peroxyxynitrate is likely  
224 overestimated given the rapid exposure of PN species to warmer temperatures through mixing, as  
225 discussed by Crawford et al. (2021). Model formaldehyde change with the inclusion of  $\sim 0.5 \text{ s}^{-1}$   
226 pentanal to F0AM by  $< 5\%$  (Figure S10). This is attributed to the balance of increased production  
227 of formaldehyde and  $\text{RO}_2$  to convert NO to  $\text{NO}_2$  by pentanal, but the decreased OH which then  
228 reduces production/conversion.  
229

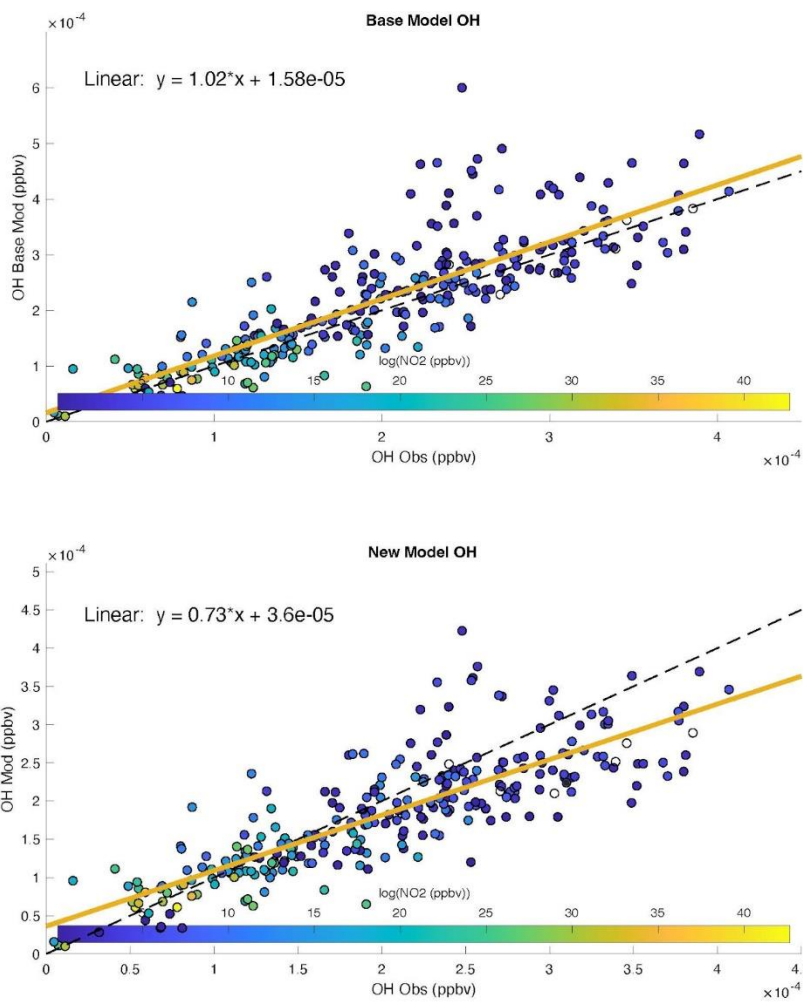

230

231 **Figure S11.** Comparison of F0AM predicted OH versus observed OH for the base F0AM model

232 (top) and sensitivity F0AM model that included  $\sim 0.5 \text{ s}^{-1}$  pentanal to account for missing R(VOC).

233 The values are colored by observed NO<sub>2</sub> (note, the scale is in logarithmic scale).

234

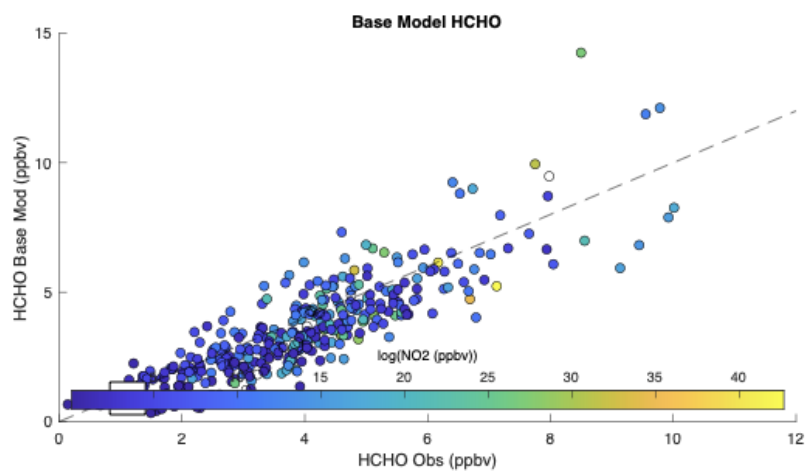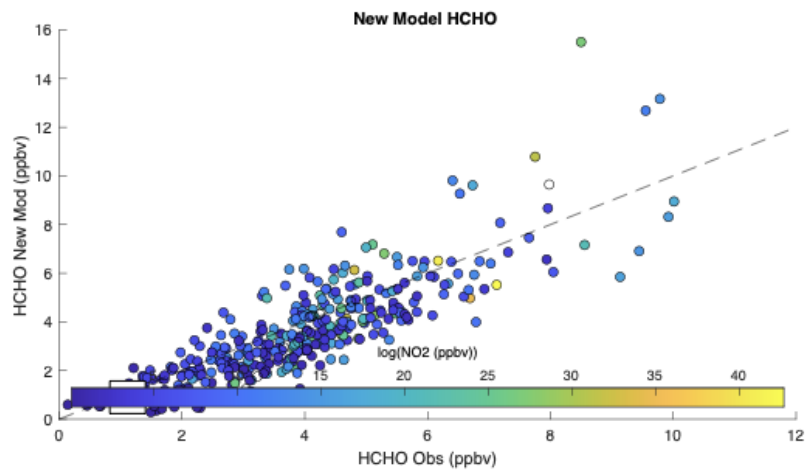

235

236 **Figure S12.** Same as Figure S11, except for formaldehyde.

237

238 **S5. Aerosol Contamination of the CAFS Downwelling Optic**

239           During KORUS-AQ ambient aerosols deposits were regularly evident on all leading edges  
240 of the aircraft, particularly during low altitude spirals near Seoul. The deposits collected on the  
241 leading edge of the downwelling CAFS optic (Figure S12), resulting in optical reductions in the  
242 actinic flux of up to 20%. The precise reductions depended on the aerosol coating efficiency and  
243 cleaning by precipitation. The optic was centered above the DC-8 fuselage in the zenith 1 port,  
244 just aft of the forward cabin exit door. The upwelling optic was unaffected, likely due to the larger  
245 aircraft boundary layer near its location under the aft fuselage.

246           Extensive analysis was required to correct the downwelling data. This involved  
247 identification of contaminated periods, characterization of the angular impact, optical thickness  
248 and time evolution. Corrections were applied to the direct beam only. Corrections to diffuse light  
249 were estimated to be small (<3%) and the corrective skill insufficient for application to the data.  
250 Such aerosol coating had not been detected during numerous high aerosol encounters on previous  
251 campaigns. They appear to result from unprecedented aerosol combinations in the SMA.

252           The final CAFS dataset includes a flagging scheme (Table S3) to tag the contaminated  
253 periods. For any quality flag > 0 the photolysis frequency uncertainties should be increased by  
254 20% to account for the low bias during contamination. For quality flag 0 the uncertainty should be  
255 conservatively increased by 10% due to the uncertainty in the aerosol cleaning efficiency during  
256 the remainder of the flights.

257



258 **Table S3.** CAFS data quality flag summary

| <b>Quality Flag</b> | <b>Aerosol deposit Contamination?</b> | <b>Direct Beam Impacted?</b> | <b>Correction Applied?</b> | <b>Correction Source</b> |
|---------------------|---------------------------------------|------------------------------|----------------------------|--------------------------|
| 0                   | No                                    | No                           | No                         | -                        |
| 1                   | Yes                                   | No                           | No                         | -                        |
| 2                   | Yes                                   | Yes                          | Yes                        | Current spiral           |
| 3                   | Yes                                   | Yes                          | Yes                        | Nearest spiral and turns |
| 4                   | Yes                                   | Unknown                      | No                         | Insufficient spiral data |

259

260

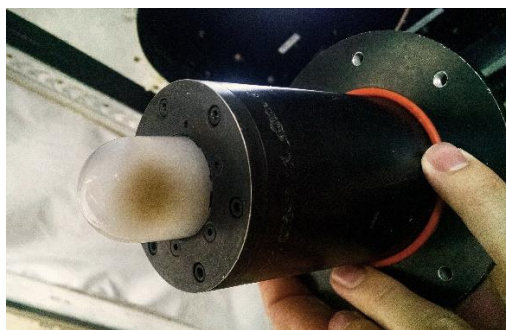

261

262 **Figure S13.** Strong aerosol contamination of the optic following the flight on 19 May, 2016.

263

264 **S6. Comparison in Calculating P(O<sub>x</sub>)**

265 Two different equations to calculate P(O<sub>x</sub>) are introduced in the main text – Eq. 1 and Eq.  
266 9. Eq. 1 is more explicit as it is tracking the number of O<sub>x</sub> molecules formed from all reactions of  
267 RO<sub>2</sub> and HO<sub>2</sub> molecules with NO (and accounting for the fraction of reactions where RO<sub>2</sub> and NO  
268 form ANs); whereas, Eq. 9 is simplified version and takes the reactivity averaged  $\alpha$  and  $\gamma$  for the  
269 environment and fold HO<sub>2</sub> into the R(VOC). Comparing the P(O<sub>x</sub>) from the two equations is shown  
270 in Figure S13. Since Eq. 1 is more explicit, it is approximately 24% higher than Eq. 9, as Eq. 9  
271 does not directly account for RO<sub>2</sub> concentrations and assumes the total amount of HO<sub>2</sub> molecules  
272 formed. Eq. 1 is more accurate as it is not assuming the total amount of HO<sub>2</sub> formed and thus used  
273 when directly calculating P(O<sub>x</sub>) (e.g., Fig. 6). Eq. 9 thus may lead to an under-estimation in  
274 unmeasured R(VOC); however, due to the number of unknowns and uncertainties, it cannot be  
275 evaluated at this time.

276

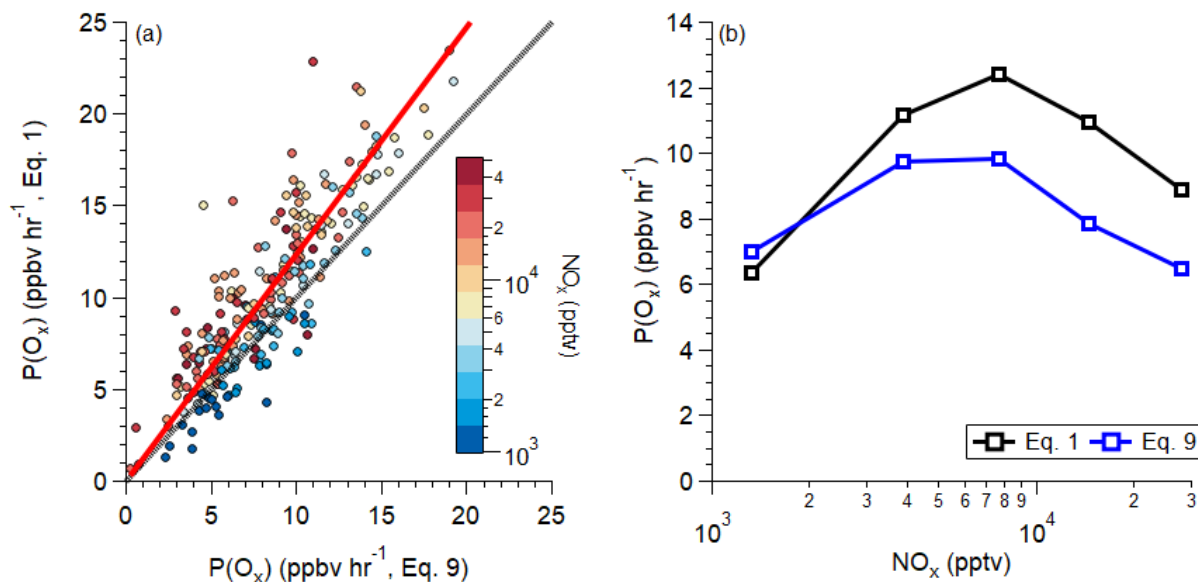

277

278 **Figure S13.** (a) Scatter plot of Eq. 1 versus Eq. 9 P(O<sub>x</sub>), colored by NO<sub>x</sub> mixing ratios. The slope,  
279 1.24, is red, and the 1:1 line is black. (b) Binned P(O<sub>x</sub>) for Eq. 1 (black) and Eq. 9 (blue).

280

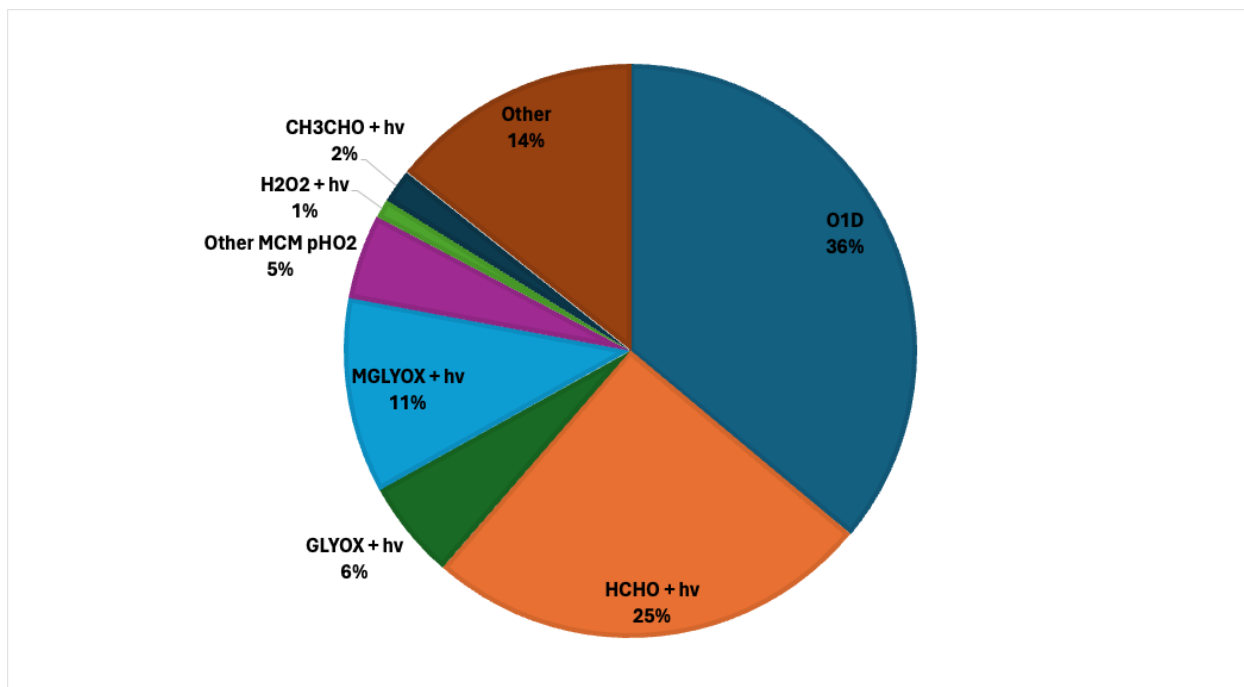

281

282 **Figure S14.** Fractional contribution for different sources of HO<sub>x</sub> predicted from F0AM.

283 **References**

- 284 Crawford, J. H., Ahn, J. Y., Al-Saadi, J., Chang, L., Emmons, L. K., Kim, J., Lee, G., Park, J. H.,  
285 Park, R. J., Woo, J. H., Song, C. K., Hong, J. H., Hong, Y. D., Lefer, B. L., Lee, M., Lee, T., Kim,  
286 S., Min, K. E., Yum, S. S., Shin, H. J., Kim, Y. W., Choi, J. S., Park, J. S., Szykman, J. J., Long,  
287 R. W., Jordan, C. E., Simpson, I. J., Fried, A., Dibb, J. E., Cho, S. Y., and Kim, Y. P.: The Korea-  
288 United States air quality (KORUS-AQ) field study, *Elementa*, 9, 1–27,  
289 <https://doi.org/10.1525/elementa.2020.00163>, 2021.
- 290 Farmer, D. K., Perring, A. E., Wooldridge, P. J., Blake, D. R., Baker, A., Meinardi, S., Huey, L.  
291 G., Tanner, D., Vargas, O., and Cohen, R. C.: Impact of organic nitrates on urban ozone  
292 production, *Atmos Chem Phys*, 11, 4085–4094, <https://doi.org/10.5194/acp-11-4085-2011>, 2011.
- 293 González-Sánchez, J. M., Brun, N., Wu, J., Ravier, S., and Clément, J.: On the importance of  
294 multiphase photolysis of organic nitrates on their global atmospheric removal, *Atmos Chem Phys*,  
295 23, 5851–5866, <https://doi.org/10.5194/acp-23-5851-2023>, 2023.
- 296 Jenkin, M. E., Young, J. C., and Rickard, A. R.: The MCM v3.3.1 degradation scheme for isoprene,  
297 *Atmos Chem Phys*, 15, 11433–11459, <https://doi.org/10.5194/acp-15-11433-2015>, 2015.
- 298 Jhun, I., Coull, B. A., Zanutti, A., and Koutrakis, P.: The impact of nitrogen oxides concentration  
299 decreases on ozone trends in the USA, *Air Qual Atmos Health*, 8, 283–292,  
300 <https://doi.org/10.1007/s11869-014-0279-2>, 2015.
- 301 Min, K.-E., Washenfelder, R. a., Dubé, W. P., Langford, a. O., Edwards, P. M., Zarzana, K. J.,  
302 Stutz, J., Lu, K., Rohrer, F., Zhang, Y., and Brown, S. S.: A broadband cavity enhanced absorption  
303 spectrometer for aircraft measurements of glyoxal, methylglyoxal, nitrous acid, nitrogen dioxide,  
304 and water vapor, *Atmos Meas Tech*, 9, 423–440, <https://doi.org/10.5194/amt-9-423-2016>, 2016.
- 305 Orlando, J. J. and Tyndall, G. S.: Laboratory studies of organic peroxy radical chemistry: an  
306 overview with emphasis on recent issues of atmospheric significance, *Chem Soc Rev*, 41, 6294–  
307 6317, <https://doi.org/10.1039/c2cs35166h>, 2012.
- 308 Perring, A. E., Pusede, S. E., and Cohen, R. C.: An observational perspective on the atmospheric  
309 impacts of alkyl and multifunctional nitrates on ozone and secondary organic aerosol., *Chem Rev*,  
310 113, 5848–70, <https://doi.org/10.1021/cr300520x>, 2013.
- 311 Pusede, S. E. and Cohen, R. C.: On the observed response of ozone to NO<sub>x</sub> and VOC reactivity  
312 reductions in San Joaquin Valley California 1995–present, *Atmos Chem Phys*, 12, 8323–8339,  
313 <https://doi.org/10.5194/acp-12-8323-2012>, 2012.
- 314 Sander, S. P., Abbatt, J. P. D., Barker, J. R., Burkholder, J. B., Friedl, R. R., Golden, D. M., Huie,  
315 R. E., Kolb, C. E., Kurylo, M. J., Moortgat, G. K., Orkin, V. L., and Wine, P. H.: Chemical Kinetics  
316 and Photochemical Data for Use in Atmospheric Studies, Evaluation No. 17, JPL Publication 10-  
317 6, Jet Propulsion Laboratory, Pasadena, 2011.
- 318 Schroeder, J. R., Crawford, J. H., Ahn, J. Y., Chang, L., Fried, A., Walega, J., Weinheimer, A.,  
319 Montzka, D. D., Hall, S. R., Ullmann, K., Wisthaler, A., Mikoviny, T., Chen, G., Blake, D. R.,  
320 Blake, N. J., Hughes, S. C., Meinardi, S., Diskin, G., Digangi, J. P., Choi, Y., Pusede, S. E., Huey,  
321 G. L., Tanner, D. J., Kim, M., and Wennberg, P.: Observation-based modeling of ozone chemistry  
322 in the Seoul metropolitan area during the Korea-United States Air Quality Study (KORUS-AQ),  
323 *Elementa*, 8, <https://doi.org/10.1525/elementa.400>, 2020.

324 Seinfeld., J. H. and Pandis, S. N.: Atmospheric Chemistry and Physics: From Air Pollution to  
325 Climate Change, Second., John Wiley & Sons, Inc., Hoboken, NJ USA, 1232 pp., 2006.

326 Thornton, J. A., Wooldridge, P. J., and Cohen, R. C.: Atmospheric NO<sub>2</sub>: In-situ laser-induced  
327 fluorescence detection at parts per trillion mixing ratios, *Anal Chem*, 72, 528–539,  
328 <https://doi.org/doi:10.1021/ac9908905>, 2000.

329 Weinheimer, A. J., Walega, J. G., Ridley, B. A., Gary, B. L., Blake, D. R., Blake, N. J., Rowland,  
330 F. S., Sachse, G. W., Anderson, B. E., and Collins, J. E.: Meridional distributions of NO<sub>x</sub>, NO<sub>y</sub>,  
331 and other species in the lower stratosphere and upper troposphere during AASE II, *Geophys Res*  
332 *Lett*, 21, 2583–2586, <https://doi.org/10.1029/94GL01897>, 1994.

333 Whalley, L. K., Stone, D., Dunmore, R., Hamilton, J., Hopkins, J. R., Lee, J. D., Lewis, A. C.,  
334 Williams, P., Kleffmann, J., Laufs, S., and Woodward-massey, R.: Understanding in situ ozone  
335 production in the summertime through radical observations and modelling studies during the Clean  
336 air for London project ( ClearfLo ), *Atmos Chem Phys*, 18, 2547–2571,  
337 <https://doi.org/10.5194/acp-18-2547-2018>, 2018.

338 Whalley, L. K., Slater, E. J., Woodward-massey, R., Ye, C., Lee, J. D., Squires, F., Mehra, A.,  
339 Worrall, S. D., Bacak, A., Bannan, T. J., Coe, H., and Percival, C. J.: Evaluating the sensitivity of  
340 radical chemistry and ozone formation to ambient VOCs and NO<sub>x</sub> in Beijing, *Atmos Chem Phys*,  
341 21, 2125–2147, <https://doi.org/10.5194/acp-21-2125-2021>, 2021.

342 Xu, L., Møller, K. H., Crounse, J. D., Kjaergaard, H. G., and Wennberg, P. O.: New insights into  
343 the radical chemistry and product distribution in the OH-initiated oxidation of benzene, *Environ*  
344 *Sci Technol*, 54, 13467–13477, <https://doi.org/10.1021/acs.est.0c04780>, 2020.

345
